# Supplementary material
Source: publisher figshare collection journal article supplement (https://frontiersin.figshare.com/ndownloader/files/11301758)
Supplement: Supplementary file [file 11301758]

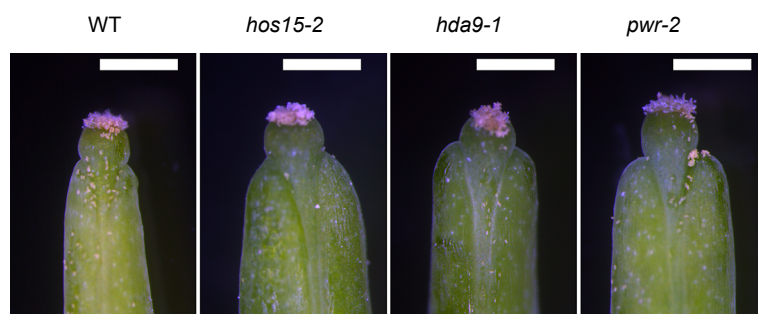

**Fig. S7. Fruit shape phenotypes.**  
Bars indicate 0.5 mm.
